# Supplementary material for: High-pressure behaviour and elastic constants of 1M and 2M1 polytypes of phlogopite KMg 3 Si 3 AlO 10 (OH) 2
Source: Copernicus journal article supplement (doi:10.5194/egusphere-2024-3429), 2025-01-15
Supplement: Supplementary file 1 [file egusphere-2024-3429-supplement.pdf]

# High-pressure behaviour and elastic constants of 1M and 2M1 polytypes of phlogopite $\text{KMg}_3\text{Si}_3\text{AlO}_{10}(\text{OH})_2$

Gianfranco Ulian<sup>1</sup>, Francesca Ranellucci<sup>1</sup>, and Giovanni Valdrè<sup>1</sup>

<sup>1</sup>Dipartimento di Scienze Biologiche, Geologiche e Ambientali, Università di Bologna “Alma Mater Studiorum”, Plesso di Mineralogia, Piazza di Porta San Donato 1, 40126 Bologna, Italy

Correspondence to: Giovanni Valdrè (giovanni.valdre@unibo.it)

## Supplementary Materials

**Table S1. Crystal structure parameters of Phlogopite-1M as a function of pressure, obtained from DFT/B3LYP-D\* simulations.**

|                         | Pressure (GPa) |         |         |         |         |         |         |         |         |         |         |        |
|-------------------------|----------------|---------|---------|---------|---------|---------|---------|---------|---------|---------|---------|--------|
|                         | 17.36          | 13.05   | 9.51    | 6.59    | 4.20    | 2.24    | 0.63    | 0.05    | -0.68   | -1.76   | -2.65   |        |
| $a$ (Å)                 | 5.1354         | 5.1645  | 5.1927  | 5.2198  | 5.2453  | 5.2688  | 5.2902  | 5.2984  | 5.3094  | 5.3270  | 5.3430  |        |
| $b$ (Å)                 | 8.8992         | 8.9542  | 9.0065  | 9.0557  | 9.1013  | 9.1428  | 9.1801  | 9.1944  | 9.2134  | 9.2441  | 9.2728  |        |
| $c$ (Å)                 | 9.3775         | 9.4901  | 9.6061  | 9.7284  | 9.8579  | 9.9960  | 10.1438 | 10.2081 | 10.3010 | 10.4689 | 10.6562 |        |
| $\beta$ (°)             | 100.91         | 100.81  | 100.69  | 100.58  | 100.48  | 100.38  | 100.27  | 100.24  | 100.20  | 100.26  | 100.70  |        |
| $V$ (Å <sup>3</sup> )   | 420.811        | 431.073 | 441.460 | 452.032 | 462.754 | 473.654 | 484.733 | 489.380 | 495.944 | 507.271 | 518.779 |        |
| $T_{\text{thick}}$ (Å)  | 2.2068         | 2.2151  | 2.2222  | 2.2294  | 2.2363  | 2.2424  | 2.2484  | 2.2506  | 2.2537  | 2.2584  | 2.2631  |        |
| $M_{\text{thick}}$ (Å)  | 2.1326         | 2.1427  | 2.1515  | 2.1590  | 2.1655  | 2.1717  | 2.1762  | 2.1786  | 2.1804  | 2.1839  | 2.1856  |        |
| $I_{\text{thick}}$ (Å)  | 2.6787         | 2.7522  | 2.8343  | 2.9247  | 3.0254  | 3.1378  | 3.2625  | 3.3175  | 3.3986  | 3.5434  | 3.6978  |        |
| $\psi$ (°)              | 58.08          | 58.13   | 58.19   | 58.25   | 58.30   | 58.35   | 58.40   | 58.41   | 58.44   | 58.48   | 58.54   |        |
| $\alpha_r$ (°)          | 14.58          | 14.11   | 13.53   | 12.90   | 12.26   | 11.62   | 11.03   | 10.78   | 10.45   | 9.80    | 8.98    |        |
| $\Delta z$ (Å)          | 0.0063         | 0.0081  | 0.0094  | 0.0102  | 0.0102  | 0.0105  | 0.0106  | 0.0107  | 0.0105  | 0.0105  | 0.0106  |        |
| TQE                     |                |         |         |         |         |         |         |         |         |         |         |        |
|                         | T1             | 1.0016  | 1.0015  | 1.0014  | 1.0014  | 1.0014  | 1.0014  | 1.0015  | 1.0015  | 1.0016  | 1.0017  | 1.0019 |
|                         | T2             | 1.0025  | 1.0023  | 1.0021  | 1.0020  | 1.0019  | 1.0018  | 1.0016  | 1.0016  | 1.0015  | 1.0014  | 1.0014 |
|                         | T3             | 1.0032  | 1.0029  | 1.0027  | 1.0024  | 1.0022  | 1.0021  | 1.0019  | 1.0019  | 1.0018  | 1.0017  | 1.0015 |
|                         | T4             | 1.0020  | 1.0018  | 1.0017  | 1.0016  | 1.0014  | 1.0014  | 1.0013  | 1.0013  | 1.0013  | 1.0014  | 1.0017 |
|                         | mean           | 1.0023  | 1.0021  | 1.0020  | 1.0019  | 1.0017  | 1.0017  | 1.0016  | 1.0016  | 1.0016  | 1.0016  | 1.0016 |
| $V_T$ (Å <sup>3</sup> ) |                |         |         |         |         |         |         |         |         |         |         |        |
|                         | T1             | 2.1664  | 2.1834  | 2.1991  | 2.2122  | 2.2252  | 2.2355  | 2.2461  | 2.2494  | 2.2536  | 2.2599  | 2.2655 |
|                         | T2             | 2.1456  | 2.1679  | 2.1860  | 2.2044  | 2.2211  | 2.2347  | 2.2470  | 2.2524  | 2.2591  | 2.2683  | 2.2731 |
|                         | T3             | 2.1530  | 2.1762  | 2.1971  | 2.2158  | 2.2328  | 2.2470  | 2.2620  | 2.2670  | 2.2739  | 2.2838  | 2.2903 |
|                         | T4             | 2.6166  | 2.6466  | 2.6712  | 2.6948  | 2.7145  | 2.7351  | 2.7508  | 2.7563  | 2.7649  | 2.7764  | 2.7861 |
|                         | mean           | 2.2704  | 2.2935  | 2.3134  | 2.3318  | 2.3484  | 2.3631  | 2.3765  | 2.3813  | 2.3879  | 2.3971  | 2.4038 |
| TAV                     |                |         |         |         |         |         |         |         |         |         |         |        |
|                         | T1             | 6.6733  | 6.2242  | 5.8474  | 5.6930  | 5.6465  | 5.6884  | 5.8077  | 5.9691  | 6.1760  | 6.8520  | 7.7975 |
|                         | T2             | 10.9318 | 9.8765  | 9.2129  | 8.6174  | 8.0949  | 7.6844  | 7.0516  | 6.8177  | 6.5159  | 6.0623  | 5.7233 |
|                         | T3             | 13.8184 | 12.3888 | 11.4494 | 10.4006 | 9.5281  | 8.9059  | 8.1187  | 7.9092  | 7.5711  | 6.8496  | 6.3742 |
|                         | T4             | 7.0267  | 6.5342  | 6.1014  | 5.6988  | 5.2548  | 5.0137  | 4.9102  | 4.9493  | 5.0012  | 5.6500  | 6.8758 |
|                         | mean           | 9.6126  | 8.7559  | 8.1528  | 7.6025  | 7.1311  | 6.8231  | 6.4721  | 6.4113  | 6.3161  | 6.3535  | 6.6927 |
| OQE                     |                |         |         |         |         |         |         |         |         |         |         |        |
|                         | M1             | 1.0064  | 1.0064  | 1.0065  | 1.0067  | 1.0069  | 1.0072  | 1.0074  | 1.0075  | 1.0077  | 1.0079  | 1.0081 |
|                         | M2             | 1.0076  | 1.0080  | 1.0084  | 1.0088  | 1.0092  | 1.0096  | 1.0099  | 1.0100  | 1.0101  | 1.0102  | 1.0103 |
|                         | M3             | 1.0075  | 1.0071  | 1.0070  | 1.0069  | 1.0069  | 1.0069  | 1.0070  | 1.0070  | 1.0071  | 1.0073  | 1.0076 |
|                         | M4             | 1.0102  | 1.0104  | 1.0107  | 1.0110  | 1.0114  | 1.0117  | 1.0122  | 1.0122  | 1.0125  | 1.0127  | 1.0131 |
|                         | M5             | 1.0084  | 1.0080  | 1.0079  | 1.0079  | 1.0080  | 1.0082  | 1.0083  | 1.0084  | 1.0086  | 1.0089  | 1.0093 |

|                          |      |         |         |         |         |         |         |         |         |         |         |         |
|--------------------------|------|---------|---------|---------|---------|---------|---------|---------|---------|---------|---------|---------|
|                          | M6   | 1.0080  | 1.0085  | 1.0090  | 1.0096  | 1.0102  | 1.0108  | 1.0114  | 1.0116  | 1.0118  | 1.0122  | 1.0124  |
|                          | mean | 1.0080  | 1.0081  | 1.0083  | 1.0085  | 1.0088  | 1.0091  | 1.0094  | 1.0095  | 1.0096  | 1.0099  | 1.0101  |
| $V_O$ ( $\text{\AA}^3$ ) | M1   | 10.7509 | 10.9359 | 11.1129 | 11.2778 | 11.4246 | 11.5666 | 11.6952 | 11.7421 | 11.8035 | 11.9045 | 11.9997 |
|                          | M2   | 10.9900 | 11.1461 | 11.3042 | 11.4473 | 11.5924 | 11.7219 | 11.8339 | 11.8795 | 11.9433 | 12.0380 | 12.1191 |
|                          | M3   | 10.7533 | 10.9516 | 11.1337 | 11.3044 | 11.4574 | 11.6025 | 11.7246 | 11.7787 | 11.8314 | 11.9325 | 12.0095 |
|                          | M4   | 10.8552 | 11.0367 | 11.2085 | 11.3717 | 11.5251 | 11.6603 | 11.7833 | 11.8353 | 11.9006 | 11.9984 | 12.0834 |
|                          | M5   | 10.7069 | 10.9026 | 11.0826 | 11.2519 | 11.4020 | 11.5451 | 11.6623 | 11.7085 | 11.7628 | 11.8586 | 11.9329 |
|                          | M6   | 10.9158 | 11.0835 | 11.2357 | 11.3767 | 11.5123 | 11.6385 | 11.7513 | 11.8011 | 11.8573 | 11.9551 | 12.0390 |
|                          | mean | 10.8287 | 11.0094 | 11.1796 | 11.3383 | 11.4856 | 11.6225 | 11.7418 | 11.7909 | 11.8498 | 11.9479 | 12.0306 |
| OAV                      | M1   | 21.7980 | 21.6368 | 21.8126 | 22.3380 | 22.9983 | 23.6038 | 24.1663 | 24.3780 | 24.7741 | 25.3148 | 25.9644 |
|                          | M2   | 21.1952 | 22.4931 | 24.0685 | 25.6111 | 27.1508 | 28.4713 | 29.7099 | 29.9842 | 30.4588 | 31.0207 | 31.4415 |
|                          | M3   | 24.8686 | 23.6203 | 22.8323 | 22.4067 | 22.2294 | 22.1414 | 22.3105 | 22.4842 | 22.7713 | 23.3354 | 24.4020 |
|                          | M4   | 33.5517 | 34.1569 | 35.1030 | 36.0813 | 37.0088 | 37.8034 | 38.9527 | 39.6922 | 40.2746 | 41.4229 | 39.0787 |
|                          | M5   | 27.8809 | 26.6329 | 26.0204 | 25.9347 | 26.1626 | 26.4992 | 27.0459 | 27.1920 | 27.8677 | 28.8367 | 30.1875 |
|                          | M6   | 26.1541 | 27.9356 | 29.6783 | 31.5629 | 33.4526 | 35.2194 | 36.8132 | 37.2858 | 37.9419 | 38.8434 | 39.2735 |
|                          | mean | 25.9081 | 26.0793 | 26.5859 | 27.3225 | 28.1671 | 28.9564 | 29.8331 | 30.1694 | 30.6814 | 31.4623 | 31.7246 |

- 10  $T_{\text{thick}}$ ,  $M_{\text{thick}}$ , and  $I_{\text{thick}}$  are tetrahedral sheet thickness (calculated from the  $z$  coordinates of the basal and apical oxygen atoms), the octahedral sheet thickness (calculated from the  $z$  coordinates of the apical and hydroxyl O atoms) and interlayer thickness (calculated from the  $z$  coordinates of the basal oxygen atoms), respectively.  $\psi$  and  $\alpha$  are the octahedral flattening angle and the tetrahedral rotation angle, respectively (Donnay et al., 1964a, b; Hazen and Burnham, 1973).  $\Delta z$  is the departure from coplanarity of the basal oxygen atoms O(b) (Güven, 1971). TQE and OQE are the tetrahedral and octahedral quadratic elongations, respectively, whereas TAV and OAV are the tetrahedral and octahedral bond angle variance, respectively (Robinson et al., 1971).  $V_T$  and  $V_O$  are the volumes of tetrahedra and octahedra, respectively. T and M represent the generic tetrahedral and octahedral sites, respectively.
- 15

**Table S2. Crystal structure parameters of Phlogopite- $2M_1$  as a function of pressure, obtained from DFT/B3LYP-D\* simulations.**

|                         | Pressure (GPa) |         |         |         |         |         |         |         |          |          |          |
|-------------------------|----------------|---------|---------|---------|---------|---------|---------|---------|----------|----------|----------|
|                         | 13.66          | 9.96    | 6.94    | 4.46    | 2.45    | 0.80    | 0.05    | -0.54   | -1.62    | -2.52    | -3.25    |
| $a$ (Å)                 | 5.1631         | 5.1919  | 5.2186  | 5.2436  | 5.2667  | 5.2878  | 5.2984  | 5.3069  | 5.3244   | 5.3408   | 5.3552   |
| $b$ (Å)                 | 8.9453         | 8.9962  | 9.0452  | 9.0911  | 9.1335  | 9.1719  | 9.1910  | 9.2065  | 9.2385   | 9.2682   | 9.2959   |
| $c$ (Å)                 | 18.706         | 18.935  | 19.178  | 19.433  | 19.704  | 19.993  | 20.156  | 20.297  | 20.612   | 20.931   | 21.256   |
| $\beta$ (°)             | 94.90          | 94.87   | 94.85   | 94.82   | 94.79   | 94.75   | 94.72   | 94.69   | 94.55    | 94.11    | 93.29    |
| $V$ (Å <sup>3</sup> )   | 860.778        | 881.229 | 902.014 | 923.107 | 944.528 | 966.294 | 978.198 | 988.361 | 1010.709 | 1033.407 | 1056.412 |
| $T_{\text{thick}}$ (Å)  | 2.2158         | 2.2230  | 2.2300  | 2.2369  | 2.2424  | 2.2484  | 2.2506  | 2.2530  | 2.2578   | 2.2629   | 2.2671   |
| $M_{\text{thick}}$ (Å)  | 2.1402         | 2.1502  | 2.1587  | 2.1650  | 2.1717  | 2.1757  | 2.1788  | 2.1800  | 2.1835   | 2.1858   | 2.1865   |
| $I_{\text{thick}}$ (Å)  | 2.7618         | 2.8401  | 2.9283  | 3.0269  | 3.1371  | 3.2590  | 3.3291  | 3.3916  | 3.5339   | 3.6828   | 3.8441   |
| $\psi$ (°)              | 57.30          | 57.22   | 57.13   | 57.08   | 57.00   | 56.98   | 56.93   | 56.92   | 56.85    | 56.82    | 56.76    |
| $\alpha_r$ (°)          | 14.24          | 13.68   | 13.05   | 12.40   | 11.76   | 11.17   | 10.85   | 10.59   | 9.97     | 9.19     | 8.30     |
| $\Delta z$ (Å)          | 0.0025         | 0.0038  | 0.0048  | 0.0065  | 0.0098  | 0.0100  | 0.0097  | 0.0081  | 0.0075   | 0.0059   | 0.0007   |
| TQE                     |                |         |         |         |         |         |         |         |          |          |          |
| T1                      | 1.0020         | 1.0018  | 1.0018  | 1.0018  | 1.0017  | 1.0016  | 1.0015  | 1.0015  | 1.0014   | 1.0014   | 1.0014   |
| T2                      | 1.0022         | 1.0020  | 1.0019  | 1.0018  | 1.0017  | 1.0015  | 1.0015  | 1.0015  | 1.0013   | 1.0012   | 1.0012   |
| T3                      | 1.0014         | 1.0014  | 1.0014  | 1.0014  | 1.0013  | 1.0014  | 1.0015  | 1.0015  | 1.0016   | 1.0018   | 1.0021   |
| T4                      | 1.0014         | 1.0013  | 1.0013  | 1.0013  | 1.0012  | 1.0012  | 1.0012  | 1.0012  | 1.0013   | 1.0015   | 1.0018   |
| mean                    | 1.0018         | 1.0016  | 1.0016  | 1.0016  | 1.0015  | 1.0014  | 1.0014  | 1.0014  | 1.0014   | 1.0015   | 1.0016   |
| $V_T$ (Å <sup>3</sup> ) |                |         |         |         |         |         |         |         |          |          |          |
| T1                      | 2.1653         | 2.1832  | 2.2014  | 2.2182  | 2.2329  | 2.2465  | 2.2519  | 2.2573  | 2.2667   | 2.2741   | 2.2791   |
| T2                      | 2.1712         | 2.1937  | 2.2132  | 2.2280  | 2.2446  | 2.2597  | 2.2663  | 2.2714  | 2.2832   | 2.2914   | 2.2941   |
| T3                      | 2.1846         | 2.2010  | 2.2137  | 2.2279  | 2.2362  | 2.2471  | 2.2499  | 2.2548  | 2.2607   | 2.2679   | 2.2723   |
| T4                      | 2.6456         | 2.6701  | 2.6939  | 2.7169  | 2.7338  | 2.7492  | 2.7574  | 2.7624  | 2.7748   | 2.7835   | 2.7950   |
| mean                    | 2.2917         | 2.3120  | 2.3306  | 2.3478  | 2.3619  | 2.3756  | 2.3814  | 2.3865  | 2.3964   | 2.4042   | 2.4101   |
| TAV                     |                |         |         |         |         |         |         |         |          |          |          |
| T1                      | 8.7670         | 7.9201  | 7.7938  | 7.6536  | 7.2782  | 6.8914  | 6.4878  | 6.3898  | 5.8480   | 5.7742   | 5.6343   |
| T2                      | 9.3465         | 8.5208  | 7.9532  | 7.4991  | 7.0701  | 6.2889  | 6.1873  | 5.9200  | 5.2435   | 4.8459   | 4.6857   |
| T3                      | 5.6795         | 5.4856  | 5.4484  | 5.4292  | 5.1392  | 5.4588  | 5.6500  | 5.5244  | 6.2617   | 7.1022   | 8.4387   |
| T4                      | 5.3158         | 4.9999  | 4.9166  | 4.8963  | 4.6933  | 4.6968  | 4.6918  | 4.7290  | 4.9050   | 5.8909   | 7.2501   |
| mean                    | 7.2772         | 6.7316  | 6.5280  | 6.3696  | 6.0452  | 5.8340  | 5.7542  | 5.6408  | 5.5646   | 5.9033   | 6.5022   |
| OQE                     |                |         |         |         |         |         |         |         |          |          |          |
| M1                      | 1.0076         | 1.0078  | 1.0080  | 1.0083  | 1.0086  | 1.0090  | 1.0091  | 1.0093  | 1.0096   | 1.0099   | 1.0102   |
| M2                      | 1.0068         | 1.0069  | 1.0071  | 1.0076  | 1.0079  | 1.0083  | 1.0084  | 1.0086  | 1.0089   | 1.0091   | 1.0095   |
| M3                      | 1.0089         | 1.0089  | 1.0090  | 1.0092  | 1.0094  | 1.0096  | 1.0097  | 1.0098  | 1.0101   | 1.0104   | 1.0107   |
| mean                    | 1.0078         | 1.0079  | 1.0080  | 1.0084  | 1.0086  | 1.0090  | 1.0091  | 1.0092  | 1.0095   | 1.0098   | 1.0101   |
| $V_O$ (Å <sup>3</sup> ) |                |         |         |         |         |         |         |         |          |          |          |
| M1                      | 10.9819        | 11.1613 | 11.3275 | 11.4712 | 11.6131 | 11.7332 | 11.7963 | 11.8434 | 11.9414  | 12.0272  | 12.0988  |
| M2                      | 11.0249        | 11.1943 | 11.3509 | 11.4878 | 11.6276 | 11.7373 | 11.8073 | 11.8504 | 11.9562  | 12.0489  | 12.1174  |
| M3                      | 10.9384        | 11.1177 | 11.2841 | 11.4389 | 11.5779 | 11.6996 | 11.7608 | 11.8076 | 11.9014  | 11.9876  | 12.0639  |
| mean                    | 10.9817        | 11.1578 | 11.3208 | 11.4660 | 11.6062 | 11.7234 | 11.7881 | 11.8338 | 11.9330  | 12.0212  | 12.0934  |
| OAV                     |                |         |         |         |         |         |         |         |          |          |          |
| M1                      | 24.7226        | 25.1851 | 25.8170 | 26.7405 | 27.5401 | 28.5645 | 28.9297 | 29.4432 | 30.2918  | 31.1641  | 32.0950  |
| M2                      | 22.6128        | 23.1668 | 23.8637 | 25.2275 | 26.1522 | 27.4350 | 27.8962 | 28.4783 | 29.2945  | 30.0863  | 31.1538  |
| M3                      | 29.2789        | 29.2291 | 29.5374 | 29.9321 | 30.2862 | 30.8173 | 31.0595 | 31.3262 | 32.1278  | 32.9727  | 34.0748  |
| mean                    | 25.5381        | 25.8603 | 26.4060 | 27.3000 | 27.9928 | 28.9389 | 29.2951 | 29.7492 | 30.5714  | 31.4077  | 32.4412  |

$T_{\text{thick}}$ ,  $M_{\text{thick}}$ , and  $I_{\text{thick}}$  are tetrahedral sheet thickness (calculated from the  $z$  coordinates of the basal and apical oxygen atoms), the octahedral sheet thickness (calculated from the  $z$  coordinates of the apical and hydroxyl O atoms) and interlayer thickness (calculated from the  $z$  coordinates of the basal oxygen atoms), respectively.  $\psi$  and  $\alpha$  are the octahedral flattening angle and the tetrahedral rotation angle, respectively (Donnay et al., 1964a, b; Hazen and Burnham, 1973).  $\Delta z$  is the departure from coplanarity of the basal oxygen atoms O(b) (Güven, 1971). TQE and OQE are the tetrahedral and octahedral quadratic elongations, respectively, whereas TAV and OAV are the tetrahedral and octahedral bond angle variance, respectively (Robinson et al., 1971).  $V_T$  and  $V_O$  are the volumes of tetrahedra and octahedra, respectively. T and M represent the generic tetrahedral and octahedral sites, respectively.

20

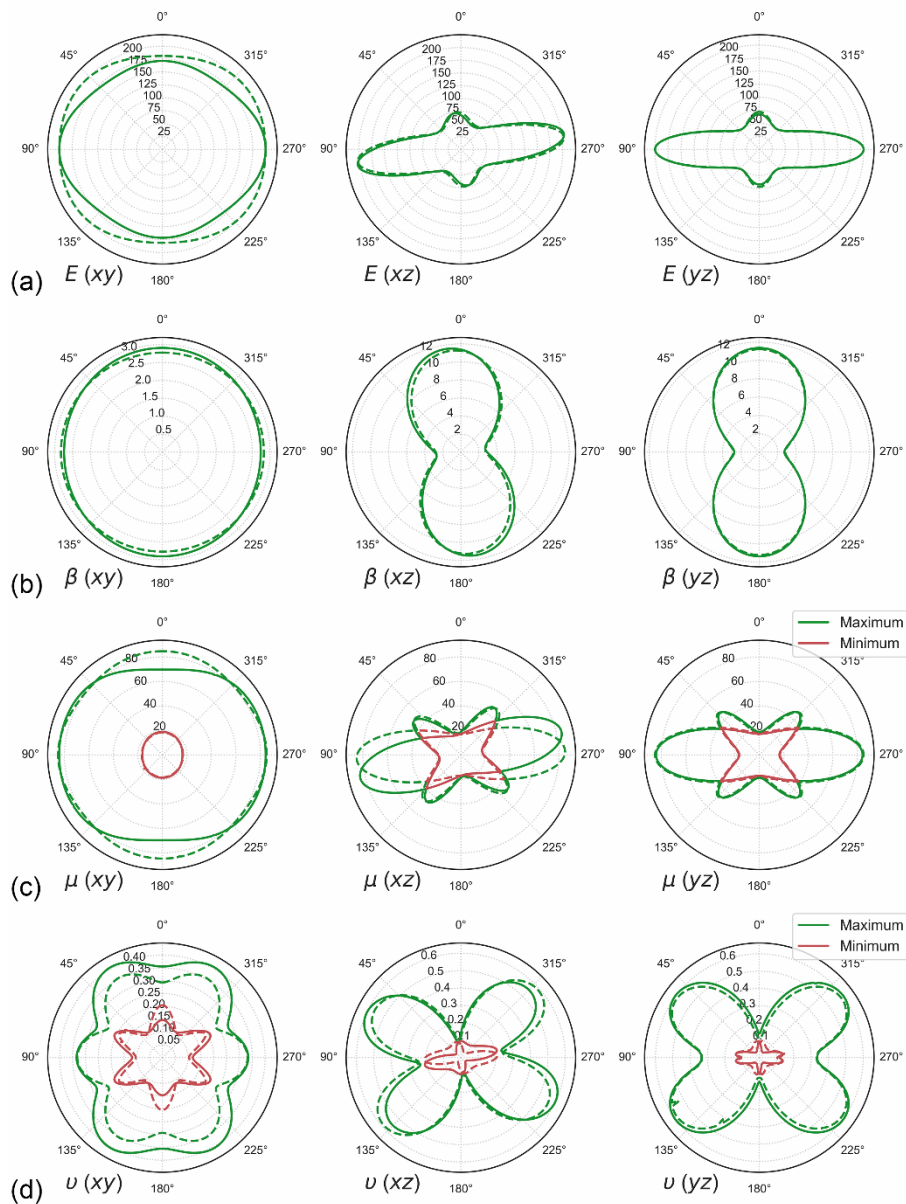

25

**Figure S1.** (a) Young's modulus (GPa), (b) linear compressibility ( $\text{TPa}^{-1}$ ), (c) shear modulus (GPa) and (d) Poisson's ratio (dimensionless) of phlogopite-1M (solid lines) and phlogopite-2M1 (dashed lines), as obtained from DFT/B3LYP-D\* calculations. Each panel reports the directional variation of the elastic property calculated on the  $xy$ ,  $xz$  and  $yz$  Cartesian planes.
